# Supplementary material for: A Clinical Staging Model for Early Intervention Youth Mental Health Services
Source: Atypon-hosted journal article supplement (doi:10.1176/appi.ps.201300221), 2014-05-15

## **Assessment protocol**

### **Intake/Initial Assessment (all clients)**

Complete HEADSS(1) assessment

Risk Assessment (harm to self, harm to others, harm from others)

Previous Mental Health Treatment History

Family History of Mental Health Problems

Psychometrics: Kessler 10 (K10)(2) and Social and Occupational Functioning Scale (SOFAS)(3)

### **Further recommended assessment for 'complex' presentations (stage 1b and above)**

Clinical assessment with senior mental health clinician.

- Current major symptoms (severity, frequency, type); characteristic mental features; age of onset and clinical course of illness prior to presentation; previous 'worst-ever' symptoms and treatments including hospital admissions; current risk of harm; previous suicide attempts/other at-risk behaviour; current (compared with premorbid) levels of functioning across domains

*Psychometrics (all clients 1b and above):*

- Brief Psychiatric Rating Scale (BPRS)(4); Prodromal Questionnaire (PQ-16)(5); Disability Assessment Schedule (WHO-DAS-12)(6) Quick Inventory of Depressive Symptomatology (QIDS)(7)

Medical assessment, including metabolic screen(8)

- Waist, weight and height measurement, BMI
- Blood pathology: LDL, TG, Tot Chol, BSL, LFTs
- Blood pressure, physical activity (mins per week), smoking.

Neuropsychology

- Attention, psychomotor speed, memory and mental flexibility via computerised Cambridge Automated Neuropsychological Testing Battery (CANTAB)(9) in the absence of a neuropsychologist on staff.

Scans

- Structural MRI for all clients stage 2 and above; (CT not recommended)

1. Goldenring JM, Rosen DS: Getting into adolescent heads: an essential update. *Contemporary Pediatrics* 21:64-92, 2004
2. Kessler RC, Andrews G, Colpe LJ, et al: Short screening scales to monitor population prevalences and trends in non-specific psychological distress. *Psychological Medicine* 32:959-976, 2002
3. Goldman H, Skodol AE, Lave T: Revising axis V for DSM-IV: a review of measures of social functioning. *American Journal of Psychiatry* 149:1148-1156, 1992
4. Overall JE, Gorham DR: The brief psychiatric rating scale. *Psychological Reports* 10:799-812, 1962
5. Ising HK, Veling W, Loewy RL, et al: The Validity of the 16-Item Version of the Prodromal Questionnaire (PQ-16) to Screen for Ultra High Risk of Developing Psychosis in the General Help-Seeking Population. *Schizophrenia Bulletin* 38:1288-1296, 2012
6. Üstün TB, Chatterji S, Kostanjsek N, et al: Developing the World Health Organization disability assessment schedule 2.0. *Bulletin of the World Health Organization* 88:815-823, 2010
7. Rush AJ, Trivedi MH, Ibrahim HM, et al: The 16-Item Quick Inventory of Depressive Symptomatology (QIDS), clinician rating (QIDS-C), and self-report (QIDS-SR): a psychometric evaluation in patients with chronic major depression. *Biological Psychiatry* 54:573-583, 2003
8. NSW Health: Metabolic monitoring, New Mental Health Clinical Documentation Module. North Sydney: Ministry of Health NSW, 2012
9. Sahakian B, Owen A: Computerized assessment in neuropsychiatry using CANTAB: discussion paper. *Journal of the Royal Society of Medicine* 85:399, 1992

**Recommended Interventions by stage and type**  
**(in addition to standard interventions/ supports)**

| Stage and estimate percentage of clients | Anxious/<br>Depression type                                                                                                                                                                              | Circadian-fatigue/<br>depression type                                                                                          | Developmental<br>type                                                                                                             |                                                                       |
|------------------------------------------|----------------------------------------------------------------------------------------------------------------------------------------------------------------------------------------------------------|--------------------------------------------------------------------------------------------------------------------------------|-----------------------------------------------------------------------------------------------------------------------------------|-----------------------------------------------------------------------|
| <b>Stage 1a</b><br>(approx. 40%)         | Clinician supported online CBT (such as ecouch <a href="http://www.ecouch.anu.edu.au">www.ecouch.anu.edu.au</a> ) or brief face-face psychological interventions with the young person and their family. |                                                                                                                                |                                                                                                                                   |                                                                       |
| <b>Stage 1b</b><br>(approx. 40%)         | <i>Psychological</i>                                                                                                                                                                                     | CBT<br>IPT<br>Problem-Solving                                                                                                  | Behavioural- Interventions<br>Physical Activity<br>Sleep-Wake Cycle<br>Circadian CBT                                              | Problem Solving<br>Social Skills Training<br>Cognitive-Remediation    |
|                                          | <i>Medical</i>                                                                                                                                                                                           | SSRIs (after adequate trial of psychosocial interventions)                                                                     | Consider the use of stage 2 level medical interventions after 6 months if client has not responded to psychological interventions |                                                                       |
| <b>Stage 2</b><br>(approx. 13%)          | <i>Psychological</i>                                                                                                                                                                                     | Use of evidence based psychological interventions for relevant syndrome; with additional emphasis on assertive case management |                                                                                                                                   |                                                                       |
|                                          | <i>Medical</i>                                                                                                                                                                                           | SNRIs                                                                                                                          | Melatonin Analogues<br>Lithium<br>Anticonvulsants                                                                                 | Atypical antipsychotics<br>Stimulants<br>Anticonvulsants<br>Fish Oils |
| <b>Stage 3</b><br>(approx. 7%)           | Usually specialist mental health service management with strong assertive community-based care coordination.                                                                                             |                                                                                                                                |                                                                                                                                   |                                                                       |
| <b>Stage 4</b>                           | As above with emphasis on clozapine, other tertiary treatments and social participation despite ongoing disability                                                                                       |                                                                                                                                |                                                                                                                                   |                                                                       |

# Clinical Staging Pathway for an Early Intervention Youth Mental Health Service

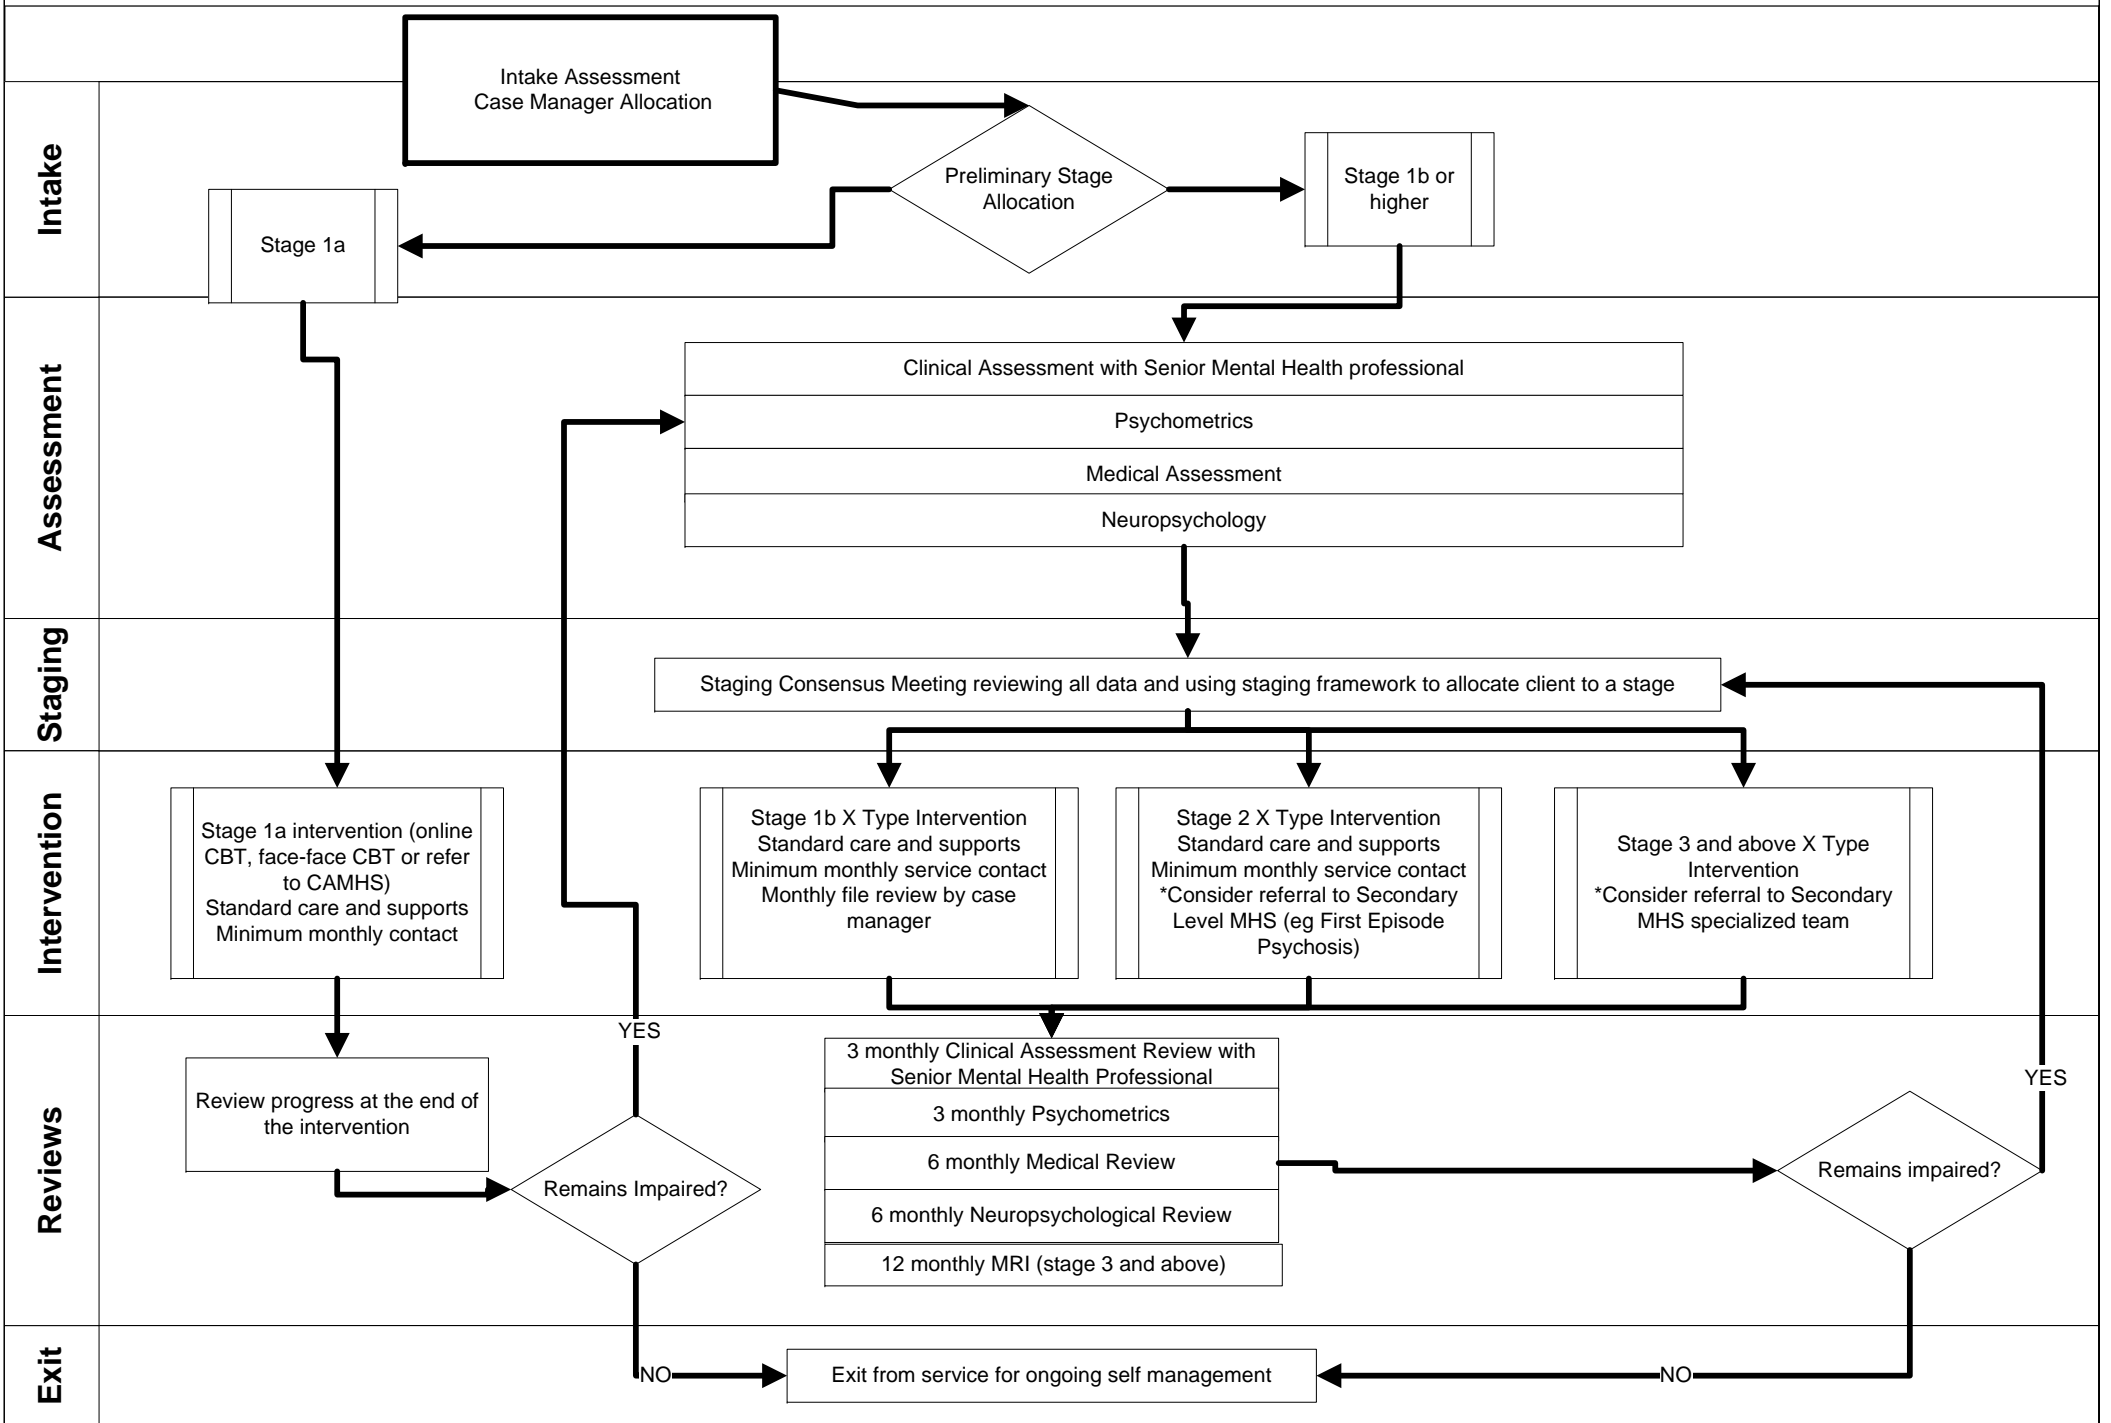

Supplement: 939_ds001.pdf [file 939_ds001.pdf]
